# Supplementary material for: In silico exploration of anticancer plant phytochemicals for EGFR-targeted lung cancer therapy
Source: Research Square preprint supplement (doi:10.21203/rs.3.rs-6422271/v1), 2025-05-07
Supplement: Supplementary file 1 [file 1e2e34da53820ce9738ccc9e.xlsx]

## Sheet: Sheet1
Name	Source	PubChem CID	Canonical SMILES	Binding Affinity		Physiochemical Properties				Pharmacokinetics		Druglikeness				Toxicity Prediction
					Molecular weight	Num. H-bond acceptors	Num. H-bond donors	Lipophilicity (iLOGP)	Water Solubility (Log S (SILICOS-IT))	GI absorption	BBB permeability	Lipinski Rule		Hepatotoxicity	Carcinogenicity	Immunotoxicity	Mutagenicity	Cytotoxicity
					<500	<10	<5	<3		Low<
Erlotinib	Standard dtug	176870	COCCOC1=C(C=C2C(=C1)C(=NC=N2)NC3=CC=CC(=C3)C#C)OCCOC	-6.9	393.44 g/mol	6	1	3.67	Moderately soluble -7.26	High	Yes	Yes; 0 violation		Active	Inactive	Active	Active	Active
Stigmasterol	Curcuma longa	5280794	CCC(C=CC(C)C1CCC2C1(CCC3C2CC=C4C3(CCC(C4)O)C)C)C(C)C	-8.5	412.69 g/mol	1	1	5.01	Poorly soluble -5.47	Low	No	Yes; 1 violation: MLOGP>4.15		Inactive	Inactive	Active	Inactive	Inactive
	Camellia sinensis
Camelliaside B		25115190	CC1C(C(C(C(O1)OCC2C(C(C(C(O2)OC3=C(OC4=CC(=CC(=C4C3=O)O)O)C5=CC=C(C=C5)O)OC6C(C(C(CO6)O)O)O)O)O)O)O)O	-8.9	726.6 g/mol	19	11	1.93	Soluble 0.51	Low	No	No; 3 violations: MW>500, NorO>10, NHorOH>5		Inactive	Inactive	Active	Inactive	Inactive
Theasapogenol E		12302288	CC1(CC2C3=CCC4C5(CCC(C(C5CCC4(C3(CC(C2(C(C1O)O)CO)O)C)C)(C)C=O)O)C)C	-9	504.7 g/mol	6	5	3.01	Moderately soluble -3.67	High	No	Yes; 1 violation: MW>500		Inactive	Inactive	Active	Inactive	Inactive
Theasinensin B		467315	C1C(C(OC2=CC(=CC(=C21)O)O)C3=CC(=C(C(=C3C4=C(C(=C(C=C4C5C(CC6=C(C=C(C=C6O5)O)O)OC(=O)C7=CC(=C(C(=C7)O)O)O)O)O)O)O)O)O)O	-9.7	762.6 g/mol	18	14	1.4	Poorly soluble -3.79	Low	No	No; 3 violations: MW>500, NorO>10, NHorOH>5		Inactive	Inactive	Inactive	Inactive	Inactive
Epigallocatechin-(4beta->8)-epicatechin-3-O-gallate ester		442678	C1C(C(OC2=C1C(=CC(=C2C3C(C(OC4=CC(=CC(=C34)O)O)C5=CC(=C(C(=C5)O)O)O)O)O)O)C6=CC(=C(C=C6)O)O)OC(=O)C7=CC(=C(C(=C7)O)O)O	-9.6	746.6 g/mol	17	13	2.19	Poorly soluble -4.16	Low	No	No; 3 violations: MW>500, NorO>10, NHorOH>5		Active	Inactive	Active	Inactive	Inactive
Theasinensin A		442543	C1C(C(OC2=CC(=CC(=C21)O)O)C3=CC(=C(C(=C3C4=C(C(=C(C=C4C5C(CC6=C(C=C(C=C6O5)O)O)OC(=O)C7=CC(=C(C(=C7)O)O)O)O)O)O)O)O)O)OC(=O)C8=CC(=C(C(=C8)O)O)O	-9.1	914.7 g/mol	22	16	2.58	Poorly soluble -4.59	Low	No	No; 3 violations: MW>500, NorO>10, NHorOH>5		Inactive	Inactive	Inactive	Inactive	Inactive
Theaflavin monogallates		169167	C1C(C(OC2=CC(=CC(=C21)O)O)C3=CC(=C(C4=C(C(=O)C=C(C=C34)C5C(CC6=C(C=C(C=C6O5)O)O)OC(=O)C7=CC(=C(C(=C7)O)O)O)O)O)O)O	-10.3	716.6 g/mol	16	11	1.83	Moderately soluble -5.06	Low	No	No; 3 violations: MW>500, NorO>10, NHorOH>5		Inactive	Inactive	Active	Inactive	Inactive
1,8-Bis((2R,3R)-3,5,7-trihydroxy-2H-1-benzopyran-2-yl)-3,4,6-trihydroxy-5H-benzocyclohepten-5-one		135403798	C1C(C(OC2=CC(=CC(=C21)O)O)C3=CC4=C(C(=C(C=C4C5C(CC6=C(C=C(C=C6O5)O)O)O)O)O)C(=O)C(=C3)O)O	-10.1	564.5 g/mol	12	9	1.84	Moderately soluble -4.22	Low	No	No; 3 violations: MW>500, NorO>10, NHorOH>5		Inactive	Inactive	Inactive	Inactive	Inactive
2'-Hydroxygenistein 7-(6''-malonylglucoside)		131752588	C1=CC(=C(C=C1O)O)C2=COC3=CC(=CC(=C3C2=O)O)OC4C(C(C(C(O4)COC(=O)CC(=O)O)O)O)O	-8.5	534.4 g/mol	8	14	1.27	Soluble -2.05	Low	No	No; 3 violations: MW>500, NorO>10, NHorOH>5		Inactive	Inactive	Inactive	Inactive	Inactive
Theaflagallin		73818214	C1C(C(OC2=CC(=CC(=C21)O)O)C3=CC(=O)C(=C4C(=C3)C=C(C(=C4O)O)O)O)O	-9.2	400.3 g/mol	9	7	1.29	Soluble -2.92	Low	No	Yes; 1 violation: NHorOH>5		Inactive	Inactive	Inactive	Inactive	Inactive
Proanthocyanidin A-6		45359583	C1C(C(OC2=CC3=C(C4C(C(O3)(OC5=CC(=CC(=C45)O)O)C6=CC(=C(C=C6)O)O)O)C(=C21)O)C7=CC(=C(C=C7)O)O)O	-9.5	576.5 g/mol	12	9	1.96	Moderately soluble -4.44	Low	No	No; 3 violations: MW>500, NorO>10, NHorOH>5		Inactive	Inactive	Inactive	Inactive	Inactive
Typhasterol		13475120	CC(C)C(C)C(C(C(C)C1CCC2C1(CCC3C2CC(=O)C4C3(CCC(C4)O)C)C)O)O	-8.5	448.7 g/mol	4	3	3.85	Moderately soluble -3.80	High	No	Yes; 0 violation		Inactive	Active	Inactive	Active	Inactive
alpha-Carotene		6419725	CC1=C(C(CCC1)(C)C)C=CC(=CC=CC(=CC=CC=C(C)C=CC=C(C)C=CC2C(=CCCC2(C)C)C)C)C	-8.6	536.9 g/mol	0	0	7.83	Insoluble -7.14	Low	No	No; 2 violations: MW>500, MLOGP>4.15		Inactive	Inactive	Inactive	Active	Inactive
Orientin		5281675	C1=CC(=C(C=C1C2=CC(=O)C3=C(O2)C(=C(C=C3O)O)C4C(C(C(C(O4)CO)O)O)O)O)O	-9.2	448.4 g/mol	11	8	1.27	Soluble -1.79	Low	No	No; 2 violations: NorO>10, NHorOH>5		Inactive	Inactive	Active	Active	Inactive
Fisetin		5281614	C1=CC(=C(C=C1C2=C(C(=O)C3=C(O2)C=C(C=C3)O)O)O)O	-8.6	286.24 g/mol	6	4	1.5	Soluble -3.82	High	No	Yes; 0 violation		Inactive	Active	Inactive	Inactive	Inactive
alpha-Spinasterin		5281331	CCC(C=CC(C)C1CCC2C1(CCC3C2=CCC4C3(CCC(C4)O)C)C)C(C)C	-8.7	412.7 g/mol	1	1	4.77	Poorly soluble -5.47	Low	No	Yes; 1 violation: MLOGP>4.15		Inactive	Inactive	Active	Inactive	Inactive
Kaempferol		5280863	C1=CC(=CC=C1C2=C(C(=O)C3=C(C=C(C=C3O2)O)O)O)O	-8.5	286.24 g/mol	6	4	1.7	Soluble -3.82	High	No	Yes; 0 violation		Inactive	Inactive	Inactive	Inactive	Inactive
Rutin		5280805	CC1C(C(C(C(O1)OCC2C(C(C(C(O2)OC3=C(OC4=CC(=CC(=C4C3=O)O)O)C5=CC(=C(C=C5)O)O)O)O)O)O)O)O	-9.1	610.5 g/mol	16	10	1.58	Soluble -0.29	Low	No	No; 3 violations: MW>500, NorO>10, NHorOH>5		Inactive	Inactive	Active	Inactive	Inactive
Stigmasterol		5280794	CCC(C=CC(C)C1CCC2C1(CCC3C2CC=C4C3(CCC(C4)O)C)C)C(C)C	-8.5	412.7 g/mol	1	1	5.01	Poorly soluble -5.47	Low	No	Yes; 1 violation: MLOGP>4.15		Inactive	Inactive	Active	Inactive	Inactive
Beta-Carotene		5280489	CC1=C(C(CCC1)(C)C)C=CC(=CC=CC(=CC=CC=C(C)C=CC=C(C)C=CC2=C(CCCC2(C)C)C)C)C	-8.5	536.9 g/mol	0	0	7.79	Insoluble -7.59	Low	No	No; 2 violations: MW>500, MLOGP>4.15		Inactive	Inactive	Inactive	Active	Inactive
Vitexin		5280441	C1=CC(=CC=C1C2=CC(=O)C3=C(O2)C(=C(C=C3O)O)C4C(C(C(C(O4)CO)O)O)O)O	-9.1	432.4 g/mol	10	7	1.38	Soluble -2.38	Low	No	Yes; 1 violation: NHorOH>5		Inactive	Inactive	Inactive	Active	Inactive
Quercetin		5280343	C1=CC(=C(C=C1C2=C(C(=O)C3=C(C=C(C=C3O2)O)O)O)O)O	-8.7	302.23 g/mol	7	5	1.63	Soluble -3.24	High	No	Yes; 0 violation		Inactive	Active	Inactive	Active	Inactive
Isoschaftoside		3084995	C1C(C(C(C(O1)C2=C(C(=C3C(=C2O)C(=O)C=C(O3)C4=CC=C(C=C4)O)C5C(C(C(C(O5)CO)O)O)O)O)O)O)O	-9	564.5 g/mol	14	10	1.41	Very soluble -0.71	Low	No	No; 3 violations: MW>500, NorO>10, NHorOH>5		Inactive	Inactive	Active	Inactive	Inactive
Epiafzelechin 3-O-gallate		467295	C1C(C(OC2=CC(=CC(=C21)O)O)C3=CC=C(C=C3)O)OC(=O)C4=CC(=C(C(=C4)O)O)O	-8.6	426.4 g/mol	9	6	1	Soluble -3.68	Low	No	Yes; 1 violation: NHorOH>5		Inactive	Inactive	Inactive	Inactive	Inactive
Vicenin 2		442664	C1=CC(=CC=C1C2=CC(=O)C3=C(C(=C(C(=C3O2)C4C(C(C(C(O4)CO)O)O)O)O)C5C(C(C(C(O5)CO)O)O)O)O)O	-9	594.5 g/mol	15	11	1.27	Soluble -0.27	Low	No	No; 3 violations: MW>500, NorO>10, NHorOH>5		Inactive	Inactive	Inactive	Active	Inactive
(-)-Gallocatechin gallate		199472	C1C(C(OC2=CC(=CC(=C21)O)O)C3=CC(=C(C(=C3)O)O)O)OC(=O)C4=CC(=C(C(=C4)O)O)O	-8.8	458.4 g/mol	11	8	1.87	Soluble -2.50	Low	No	No; 2 violations: NorO>10, NHorOH>5		Inactive	Inactive	Inactive	Inactive	Inactive
5,7-dihydroxy-2-(4-hydroxyphenyl)-6-[(2R,3R,4R,5S,6R)-3,4,5-trihydroxy-6-(hydroxymethyl)oxan-2-yl]-8-[(2S,3R,4S,5S)-3,4,5-trihydroxyoxan-2-yl]chromen-4-one		182689	C1C(C(C(C(O1)C2=C3C(=C(C(=C2O)C4C(C(C(C(O4)CO)O)O)O)O)C(=O)C=C(O3)C5=CC=C(C=C5)O)O)O)O	-9.1	564.5 g/mol	14	10	1.63	Very soluble -0.71	Low	No	No; 3 violations: MW>500, NorO>10, NHorOH>5		Inactive	Inactive	Active	Inactive	Inactive
(-)-Epicatechin gallate		107905	C1C(C(OC2=CC(=CC(=C21)O)O)C3=CC(=C(C=C3)O)O)OC(=O)C4=CC(=C(C(=C4)O)O)O	-8.8	442.4 g/mol	10	7	1.44	Soluble -3.09	Low	No	Yes; 1 violation: NHorOH>5		Inactive	Inactive	Inactive	Inactive	Inactive
Strictinin		73330	C1C2C(C(C(C(O2)OC(=O)C3=CC(=C(C(=C3)O)O)O)O)O)OC(=O)C4=CC(=C(C(=C4C5=C(C(=C(C=C5C(=O)O1)O)O)O)O)O)O	-9.1	634.5 g/mol	18	17	0.92	Soluble -0.51	Low	No	No; 3 violations: MW>500, NorO>10, NHorOH>5		Inactive	Inactive	Active	Inactive	Inactive
Epigallocatechin Gallate		65064	C1C(C(OC2=CC(=CC(=C21)O)O)C3=CC(=C(C(=C3)O)O)O)OC(=O)C4=CC(=C(C(=C4)O)O)O	-8.6	458.4 g/mol	11	8	1.87	Soluble -2.50	Low	No	No; 2 violations: NorO>10, NHorOH>5		Inactive	Inactive	Inactive	Inactive	Inactive
	Vitis vinifera
Stigmasterol		5280794	CCC(C=CC(C)C1CCC2C1(CCC3C2CC=C4C3(CCC(C4)O)C)C)C(C)C	-8.6	412.7 g/mol	1	1	5.01	Poorly soluble -5.47	Low	No	Yes; 1 violation: MLOGP>4.15		Inactive	Inactive	Active	Inactive	Inactive
Quercetin		5280343	C1=CC(=C(C=C1C2=C(C(=O)C3=C(C=C(C=C3O2)O)O)O)O)O	-8.7	302.23 g/mol	7	5	1.63	Soluble -3.24	High	No	Yes; 0 violation		Inactive	Active	Inactive	Active	Inactive
4-[(2R,3R)-3-(3,5-dihydroxyphenyl)-6-hydroxy-4-[(Z)-2-(4-hydroxyphenyl)vinyl]-2,3-dihydrobenzofuran-2-yl]benzene-1,2-diol		5279245	C1=CC(=CC=C1C=CC2=C3C(C(OC3=CC(=C2)O)C4=CC(=C(C=C4)O)O)C5=CC(=CC(=C5)O)O)O	-9.1	470.5 g/mol	7	6	2.28	Poorly soluble -6.27	Low	No	Yes; 1 violation: NHorOH>5		Inactive	Active	Active	Active	Inactive
Ergosterol		444679	CC(C)C(C)C=CC(C)C1CCC2C1(CCC3C2=CC=C4C3(CCC(C4)O)C)C	-8.7	396.6 g/mol	1	1	4.92	Poorly soluble -5.06	Low	No	Yes; 1 violation: MLOGP>4.15		Inactive	Inactive	Active	Inactive	Inactive
Lupeol		259846	CC(=C)C1CCC2(C1C3CCC4C5(CCC(C(C5CCC4(C3(CC2)C)C)(C)C)O)C)C	-8.9	426.7 g/mol	1	1	4.68	Poorly soluble -6.74	Low	No	Yes; 1 violation: MLOGP>4.15		Inactive	Inactive	Active	Inactive	Inactive
Procyanidin B2, (+)-		122738	C1C(C(OC2=C1C(=CC(=C2C3C(C(OC4=CC(=CC(=C34)O)O)C5=CC(=C(C=C5)O)O)O)O)O)C6=CC(=C(C=C6)O)O)O	-9.5	578.5 g/mol	12	10	2.05	Moderately soluble -3.91	Low	No	No; 3 violations: MW>500, NorO>10, NHorOH>5		Inactive	Inactive	Active	Inactive	Inactive
(-)-Epicatechin gallate		107905	C1C(C(OC2=CC(=CC(=C21)O)O)C3=CC(=C(C=C3)O)O)OC(=O)C4=CC(=C(C(=C4)O)O)O	-8.8	442.4 g/mol	10	7	1.44	Soluble -3.09	Low	No	Yes; 1 violation: NHorOH>5		Inactive	Inactive	Inactive	Inactive	Inactive
Lupenone		92158	CC(=C)C1CCC2(C1C3CCC4C5(CCC(=O)C(C5CCC4(C3(CC2)C)C)(C)C)C)C	-9.1	424.7 g/mol	1	0	4.54	Poorly soluble -7.44	Low	No	Yes; 1 violation: MLOGP>4.15		Inactive	Inactive	Inactive	Inactive	Inactive
	Gingko biloba
kaempferol 7-O-glucoside		10095180	C1=CC(=CC=C1C2=C(C(=O)C3=C(C=C(C=C3O2)OC4C(C(C(C(O4)CO)O)O)O)O)O)O	-8.7	448.38 g/mol	11	7	1.55	Moderately soluble -2.10	Low	No	No; 2 violations: NorO>10, NHorOH>5		Inactive	Inactive	Inactive	Inactive	Inactive
Procyanidin		107876	C1C(C(OC2=CC(=CC(=C21)O)O)C3=CC(=C(C=C3)O)O)OC4(C(C(C5=C(C=C(C=C5O4)O)O)O)O)C6=CC(=C(C=C6)O)O	-8.6	594.52 g/mol	13	10	2.17	Soluble -3.85	Low	No	No; 3 violations: MW>500, NorO>10, NHorOH>5		Inactive	Inactive	Inactive	Inactive	Inactive
Chaetoglobosin U		11570022	CC1CC=CC2C3C(O3)(C(C4C2(C(=O)CC5C1C(=C(C5=O)O)C)C(=O)NC4CC6=CNC7=CC=CC=C76)C)C	-10	528.64 g/mol	5	3	3.17	Poorly soluble	High	No	Yes; 1 violation: MW>500		Inactive	Inactive	Active	Inactive	Inactive
(6S,7aR)-2-[(2E,4E,6E,8E,10E,12E,14E)-15-[(6S,7aR)-6-hydroxy-4,4,7a-trimethyl-2,5,6,7-tetrahydro-1-benzofuran-2-yl]-6,11-dimethylhexadeca-2,4,6,8,10,12,14-heptaen-2-yl]-4,4,7a-trimethyl-2,5,6,7-tetrahydro-1-benzofuran-6-ol		134781708	CC(=CC=CC=C(C)C=CC=C(C)C1C=C2C(CC(CC2(O1)C)O)(C)C)C=CC=C(C)C3C=C4C(CC(CC4(O3)C)O)(C)C	-8.7	600.87 g/mol	4	2	6.9	Moderately soluble	Low	No	No; 2 violations: MW>500, MLOGP>4.15		Inactive	Active	Active	Inactive	Inactive
Isorhamnetin-3-rutinoside		17751019	CC1C(C(C(C(O1)OCC2C(C(C(C(O2)OC3=C(OC4=CC(=CC(=C4C3=O)O)O)C5=CC(=C(C=C5)O)OC)O)O)O)O)O)O	-8.7	624.54 g/mol	16	9	2.62	Soluble -0.97	Low	No	No; 3 violations: MW>500, NorO>10, NHorOH>5		Inactive	Inactive	Active	Inactive	Inactive
Ergosterol		444679	CC(C)C(C)C=CC(C)C1CCC2C1(CCC3C2=CC=C4C3(CCC(C4)O)C)C	-8.7	396.65 g/mol	1	1	4.92	Moderately soluble -5.06	Low	No	Yes; 1 violation: MLOGP>4.15		Inactive	Inactive	Active	Inactive	Inactive
Violaxanthin		448438	CC(=CC=CC=C(C)C=CC=C(C)C=CC12C(CC(CC1(O2)C)O)(C)C)C=CC=C(C)C=CC34C(CC(CC3(O4)C)O)(C)C	-8.5	600.87 g/mol	4	2	7.22	Moderately soluble -5.38	Low	No	No; 2 violations: MW>500, MLOGP>4.15		Inactive	Inactive	Inactive	Inactive	Inactive
Episesamin		5204	C1C2C(COC2C3=CC4=C(C=C3)OCO4)C(O1)C5=CC6=C(C=C5)OCO6	-8.7	354.35 g/mol	6	0	3.46		High	Yes	Yes; 0 violation		Inactive	Active	Active	Inactive	Inactive
Quercetin		5280343	C1=CC(=C(C=C1C2=C(C(=O)C3=C(C=C(C=C3O2)O)O)O)O)O	-8.7	302.24 g/mol	7	5	1.63	Soluble -3.24	High	No	Yes; 0 violation		Inactive	Active	Inactive	Active	Inactive
Apigetrin		5280704	C1=CC(=CC=C1C2=CC(=O)C3=C(C=C(C=C3O2)OC4C(C(C(C(O4)CO)O)O)O)O)O	-8.9	432.38 g/mol	10	6	2.17	Soluble -2.69	Low	No	Yes; 1 violation: NHorOH>5		Inactive	Inactive	Inactive	Active	Inactive
Stigmasterol		5280794	CCC(C=CC(C)C1CCC2C1(CCC3C2CC=C4C3(CCC(C4)O)C)C)C(C)C	-8.6	412.69 g/mol	1	1	5.01	Moderately soluble -5.47	Low	No	Yes; 1 violation: MLOGP>4.15		Inactive	Inactive	Active	Inactive	Inactive
Rutin		5280805	CC1C(C(C(C(O1)OCC2C(C(C(C(O2)OC3=C(OC4=CC(=CC(=C4C3=O)O)O)C5=CC(=C(C=C5)O)O)O)O)O)O)O)O	-9.1	610.52 g/mol	16	10	1.58	Soluble -0.29	Low	No	No; 3 violations: MW>500, NorO>10, NHorOH>5		Inactive	Inactive	Active	Inactive	Inactive
Zeaxanthin		5280899	CC1=C(C(CC(C1)O)(C)C)C=CC(=CC=CC(=CC=CC=C(C)C=CC=C(C)C=CC2=C(CC(CC2(C)C)O)C)C)C	-8.5	568.87 g/mol	2	2	7.23	Moderately soluble -5.94	Low	No	No; 2 violations: MW>500, MLOGP>4.15		Inactive	Inactive	Inactive	Inactive	Inactive
Amentoflavone		5281600	C1=CC(=CC=C1C2=CC(=O)C3=C(O2)C(=C(C=C3O)O)C4=C(C=CC(=C4)C5=CC(=O)C6=C(C=C(C=C6O5)O)O)O)O	-9.6	538.46 g/mol	10	6	3.06	Poorly soluble	Low	No	No; 2 violations: MW>500, NHorOH>5		Inactive	Inactive	Active	Inactive	Inactive
6-Deoxyjacareubin		5281629	CC1(C=CC2=C(O1)C=C3C(=C2O)C(=O)C4=C(O3)C(=CC=C4)O)C	-8.7	310.30 g/mol	5	2			High	No	Yes; 0 violation		Inactive	Inactive	Active	Active	Inactive
Isorhamnetin		5281654	COC1=C(C=CC(=C1)C2=C(C(=O)C3=C(C=C(C=C3O2)O)O)O)O	-8.7	316.26 g/mol	7	4	2.35	Moderately soluble -3.94	High	No	Yes; 0 violation		Inactive	Inactive	Active	Inactive	Inactive
Morin		5281670	C1=CC(=C(C=C1O)O)C2=C(C(=O)C3=C(C=C(C=C3O2)O)O)O	-8.5	302.24 g/mol	7	5	1.47	Soluble -3.24	High	No	Yes; 0 violation		Inactive	Inactive	Active	Inactive	Inactive
9-cis-Violaxanthin		5282218	CC(=CC=CC=C(C)C=CC=C(C)C=CC12C(CC(CC1(O2)C)O)(C)C)C=CC=C(C)C=CC34C(CC(CC3(O4)C)O)(C)C	-8.5	600.87 g/mol	4	2	7.22	Moderately soluble -5.38	Low	No	No; 2 violations: MW>500, MLOGP>4.15		Inactive	Inactive	Inactive	Inactive	Inactive
Kaempferol-3-O-rutinoside		5318767	CC1C(C(C(C(O1)OCC2C(C(C(C(O2)OC3=C(OC4=CC(=CC(=C4C3=O)O)O)C5=CC=C(C=C5)O)O)O)O)O)O)O	-8.5	594.52 g/mol	15	9	2.79	Soluble -0.88	Low	No	No; 3 violations: MW>500, NorO>10, NHorOH>5		Inactive	Active	Inactive	Inactive	Inactive
Narcissin		5481663	CC1C(C(C(C(O1)OCC2C(C(C(C(O2)OC3=C(OC4=CC(=CC(=C4C3=O)O)O)C5=CC(=C(C=C5)O)OC)O)O)O)O)O)O	-9	624.54 g/mol	16	9	2.62	Soluble -0.97	Low	No	No; 3 violations: MW>500, NorO>10, NHorOH>5		Inactive	Inactive	Active	Inactive	Inactive
Sequoiaflavone		5484010	COC1=CC(=C2C(=C1)OC(=CC2=O)C3=CC(=C(C=C3)O)C4=C(C=C(C5=C4OC(=CC5=O)C6=CC=C(C=C6)O)O)O)O	-9.6	552.48 g/mol	10	5	3.67	Poorly soluble -9.39	Low	No	Yes; 1 violation: MW>500		Inactive	Inactive	Active	Inactive	Inactive
Kaempferol-3-O-glucosyl(1-2)rhamnoside		5489470	CC1C(C(C(C(O1)OC2=C(OC3=CC(=CC(=C3C2=O)O)O)C4=CC=C(C=C4)O)OC5C(C(C(C(O5)CO)O)O)O)O)O	-8.9	594.52 g/mol	15	9	1.91	Soluble -0.88	Low	No	No; 3 violations: MW>500, NorO>10, NHorOH>5		Inactive	Inactive	Active	Inactive	Inactive
