# Supplementary material for: In silico exploration of anticancer plant phytochemicals for EGFR-targeted lung cancer therapy
Source: Research Square preprint supplement (doi:10.21203/rs.3.rs-6422271/v1), 2025-05-07
Supplement: Supplementary file 3 [file 4020bd82f49354226bb0e569.xlsx]

## Sheet: Sheet1
PocID	Chain	SeqID	AA	ATOM
1	A	718	LEU	C
1	A	718	LEU	O
1	A	718	LEU	CB
1	A	718	LEU	CG
1	A	718	LEU	CD1
1	A	718	LEU	CD2
1	A	719	GLY	N
1	A	719	GLY	CA
1	A	719	GLY	C
1	A	719	GLY	O
1	A	720	SER	N
1	A	720	SER	CA
1	A	720	SER	C
1	A	722	ALA	CA
1	A	722	ALA	CB
1	A	723	PHE	N
1	A	723	PHE	CA
1	A	723	PHE	C
1	A	723	PHE	O
1	A	723	PHE	CB
1	A	723	PHE	CD2
1	A	724	GLY	N
1	A	724	GLY	CA
1	A	724	GLY	O
1	A	726	VAL	CB
1	A	726	VAL	CG1
1	A	726	VAL	CG2
1	A	743	ALA	C
1	A	743	ALA	O
1	A	743	ALA	CB
1	A	745	LYS	N
1	A	745	LYS	CB
1	A	745	LYS	CG
1	A	745	LYS	CD
1	A	745	LYS	CE
1	A	745	LYS	NZ
1	A	747	LEU	N
1	A	747	LEU	CA
1	A	747	LEU	CD2
1	A	754	LYS	O
1	A	754	LYS	CE
1	A	754	LYS	NZ
1	A	755	ALA	CA
1	A	755	ALA	O
1	A	755	ALA	CB
1	A	757	LYS	CD
1	A	757	LYS	NZ
1	A	758	GLU	N
1	A	758	GLU	CA
1	A	758	GLU	O
1	A	758	GLU	CB
1	A	758	GLU	CG
1	A	758	GLU	CD
1	A	758	GLU	OE1
1	A	758	GLU	OE2
1	A	759	ILE	N
1	A	759	ILE	CA
1	A	759	ILE	CB
1	A	759	ILE	CG1
1	A	759	ILE	CD1
1	A	761	ASP	CB
1	A	761	ASP	CG
1	A	761	ASP	OD2
1	A	762	GLU	N
1	A	762	GLU	O
1	A	762	GLU	CB
1	A	762	GLU	CG
1	A	762	GLU	CD
1	A	762	GLU	OE1
1	A	762	GLU	OE2
1	A	765	VAL	CB
1	A	766	MET	CG
1	A	766	MET	SD
1	A	766	MET	CE
1	A	775	CYS	CA
1	A	775	CYS	CB
1	A	775	CYS	SG
1	A	776	ARG	N
1	A	776	ARG	O
1	A	788	LEU	O
1	A	788	LEU	CB
1	A	788	LEU	CD1
1	A	790	THR	CB
1	A	790	THR	OG1
1	A	790	THR	CG2
1	A	791	GLN	N
1	A	791	GLN	O
1	A	791	GLN	CB
1	A	791	GLN	OE1
1	A	792	LEU	CD1
1	A	793	MET	N
1	A	793	MET	O
1	A	793	MET	CB
1	A	793	MET	CG
1	A	793	MET	SD
1	A	794	PRO	CA
1	A	794	PRO	O
1	A	796	GLY	N
1	A	796	GLY	CA
1	A	797	CYS	N
1	A	797	CYS	CB
1	A	797	CYS	SG
1	A	800	ASP	CB
1	A	800	ASP	OD1
1	A	836	ARG	NH1
1	A	836	ARG	NH2
1	A	837	ASP	CB
1	A	837	ASP	CG
1	A	837	ASP	OD1
1	A	837	ASP	OD2
1	A	841	ARG	O
1	A	841	ARG	CB
1	A	841	ARG	CG
1	A	841	ARG	CD
1	A	841	ARG	NE
1	A	841	ARG	NH2
1	A	842	ASN	OD1
1	A	842	ASN	ND2
1	A	844	LEU	CD1
1	A	844	LEU	CD2
1	A	852	LYS	CD
1	A	854	THR	OG1
1	A	854	THR	CG2
1	A	855	ASP	N
1	A	855	ASP	CA
1	A	855	ASP	O
1	A	855	ASP	CB
1	A	855	ASP	CG
1	A	855	ASP	OD1
1	A	855	ASP	OD2
1	A	856	PHE	N
1	A	856	PHE	C
1	A	856	PHE	O
1	A	856	PHE	CD1
1	A	856	PHE	CD2
1	A	856	PHE	CE1
1	A	857	GLY	N
1	A	857	GLY	CA
1	A	857	GLY	C
1	A	857	GLY	O
1	A	858	ARG	N
1	A	858	ARG	CA
1	A	858	ARG	CB
1	A	858	ARG	CG
1	A	858	ARG	CD
1	A	858	ARG	NE
1	A	858	ARG	CZ
1	A	858	ARG	NH1
1	A	858	ARG	NH2
1	A	860	LYS	NZ
1	A	876	VAL	N
1	A	876	VAL	CA
1	A	876	VAL	C
1	A	876	VAL	CG1
1	A	876	VAL	CG2
1	A	877	PRO	N
1	A	877	PRO	CA
1	A	877	PRO	CB
1	A	877	PRO	CG
1	A	877	PRO	CD
1	A	881	MET	CE
1	A	889	ARG	CB
1	A	889	ARG	CG
1	A	889	ARG	CD
1	A	889	ARG	NH1
1	A	891	TYR	CE2
1	A	891	TYR	OH
