# Supplementary material for: In silico exploration of anticancer plant phytochemicals for EGFR-targeted lung cancer therapy
Source: Research Square preprint supplement (doi:10.21203/rs.3.rs-6422271/v1), 2025-05-07
Supplement: Supplementary file 4 [file 8133950217ce7bbbba27df22.docx]

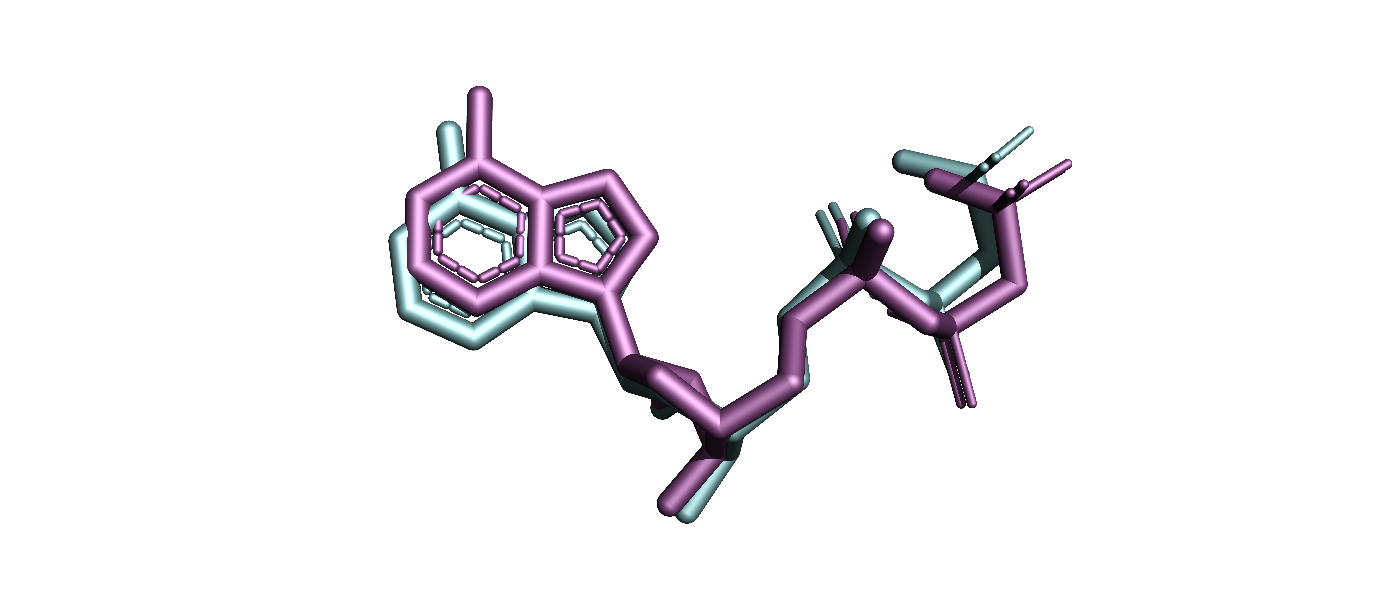

**Figure S4:** Superimposed structures of cocrystal ligand (Cyan), and its re-docked conformer (Magenta) with an RMSD of 0.00 Å.
