# Supplementary material for: In silico exploration of anticancer plant phytochemicals for EGFR-targeted lung cancer therapy
Source: Research Square preprint supplement (doi:10.21203/rs.3.rs-6422271/v1), 2025-05-07
Supplement: Supplementary file 6 [file a9deabae19a26f53a789faee.docx]

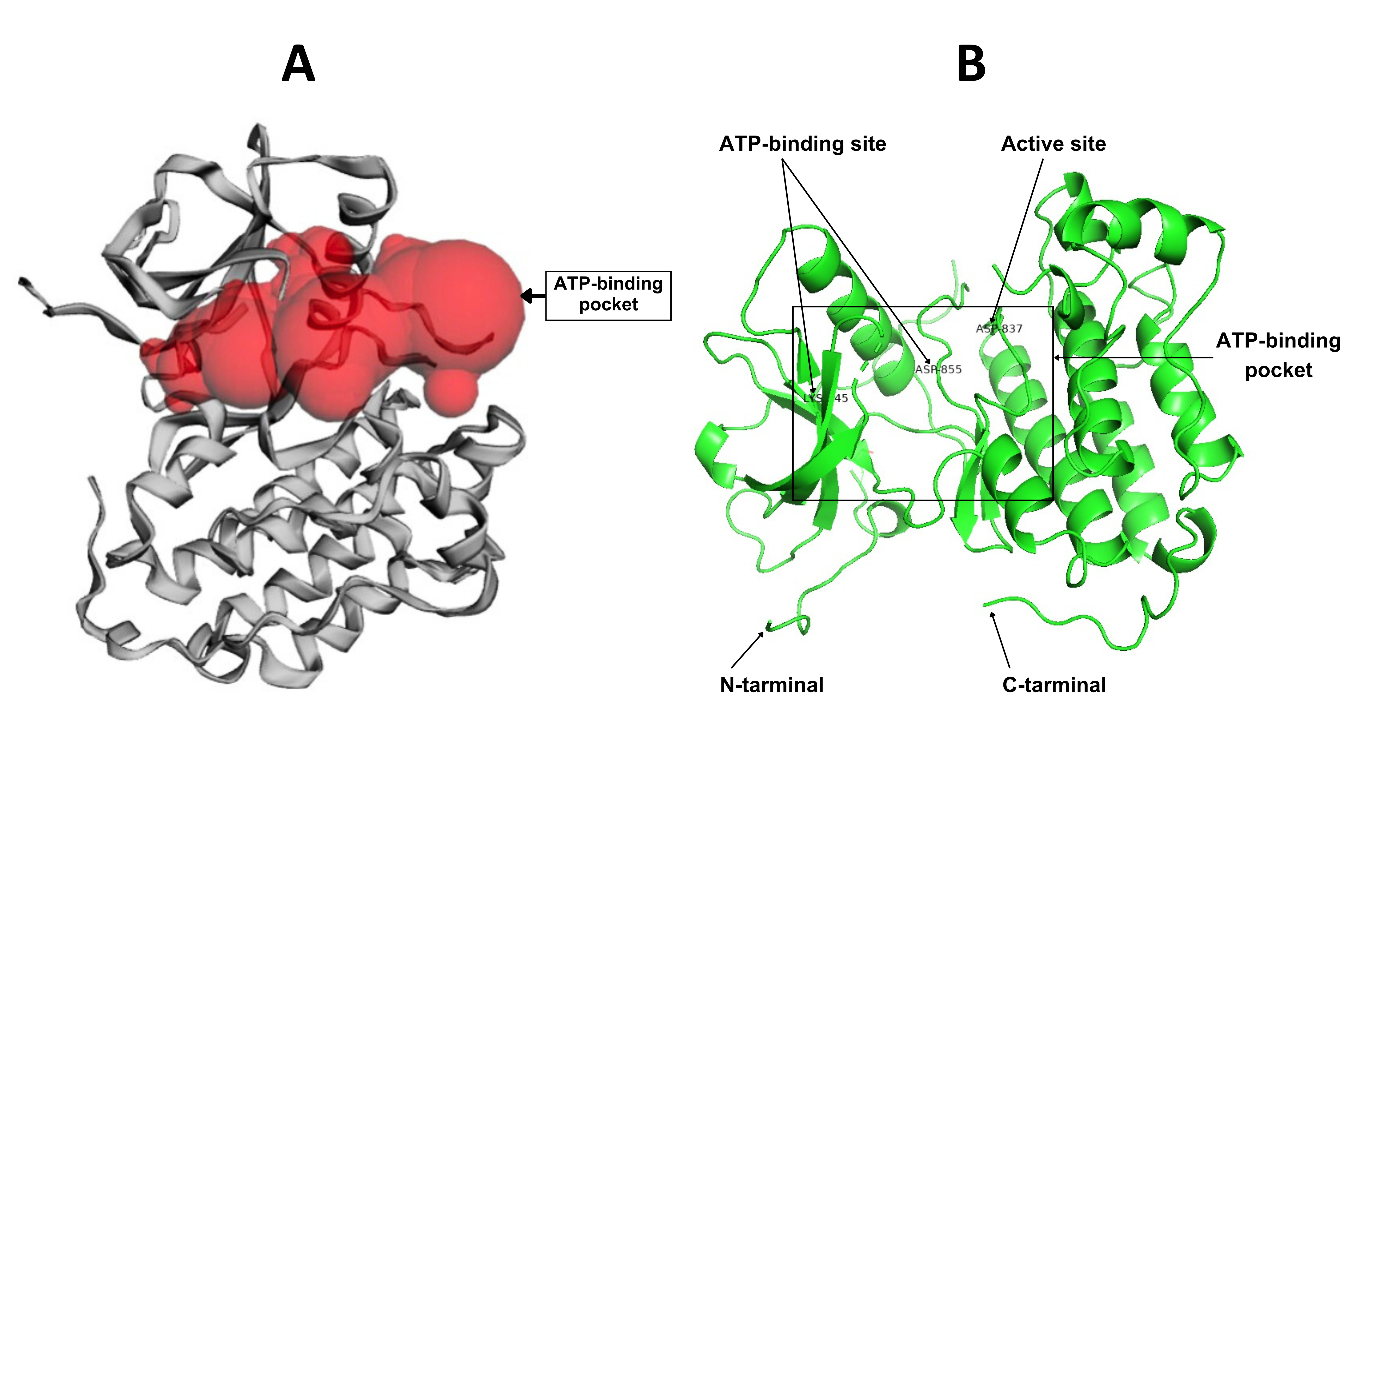


**Figure S3:** A) The surface representation of the ATP-binding pocket of the EGFR protein (B) The cartoon representation of the EGFR protein, highlighting the key structural features
