# Supplementary material for: In silico exploration of anticancer plant phytochemicals for EGFR-targeted lung cancer therapy
Source: Research Square preprint supplement (doi:10.21203/rs.3.rs-6422271/v1), 2025-05-07
Supplement: Supplementary file 7 [file d6158199615421ce547d03f3.docx]

**Supplementary Table S3:** MM-GBSA results

| Complex | **Energy component (kcal/mol)** | | | | | | | | |
| --- | --- | --- | --- | --- | --- | --- | --- | --- | --- |
| ENTROPY (-TΔS) | ΔVDWAALS | ΔEEL | ΔEGB | ΔESURF | ΔGGAS | ΔGSOLV | ΔTOTAL | ΔG binding |
| **EGFR Kaempferol Complex** | | | | | | | | | |
| Run 1 | 2.56 (0.37) | -36.93 (0.67) | -4.68(0.71) | 7.34 (0.36) | -5.33 (0.04) | -41.61 (0.98) | 2.01 (0.36) | -39.60 (1.04) | -34.37 (2.42) |
| Run 2 | 2.38 (0.05) | -31.27 (0.43) | -5.12 (0.99) | 7.35 (0.76) | -4.90 (0.01) | -36.39 (1.08) | 2.45 (0.76) | -33.94 (1.32) | -28.37 (2.51) |
| Run 3 | 2.55 (0.03) | -32.96 (0.55) | -8.02 (0.73) | 8.84 (0.48) | -5.23 (0.01) | -40.99 (0.91) | 3.61 (0.48) | -37.38 (1.03) | -32.95 (2.57) |
| Concatenated  Trajectory | 2.56 (0.37) | -36.93 (0.67) | -4.68 (0.71) | 7.34 (0.36) | -5.33 (0.04) | -41.61 (0.98) | 2.01 (0.36) | -39.60 (1.04) | -34.37 (2.42) |
| **EGFR Isorhamnetin Complex** | | | | | | | | | |
| Run 1 | 2.78 (0.05) | -34.05 (0.80) | -3.88 (1.19) | 7.04 (0.67) | -5.26 (0.10) | -37.93 (1.43) | 1.78 (0.68) | -36.15 (1.58) | -28.34 (2.61) |
| Run 2 | 2.73 (0.04) | -36.35 (0.91) | -4.59 (1.16) | 7.96 (0.79) | -5.56 (0.08) | -40.94 (1.48) | 2.40 (0.80) | -38.55 (1.68) | -32.01 (2.57) |
| Run 3 | 2.60 (0.09) | -37.65 (0.62) | -4.08 (1.06) | 7.45 (0.75) | -5.48 (0.23) | -41.72 (1.23) | 1.96 (0.75) | -39.76 (1.43) | -35.09 (2.48) |
| Concatenated  Trajectory | 2.81 (0.05) | -34.17 (0.59) | -3.85 (1.17) | 7.05 (0.64) | -5.27 (0.10) | -38.02 (1.32) | 1.78 (0.64) | -36.24 (1.47) | -30.31 (2.64) |
| **EGFR Morin Complex** | | | | | | | | | |
| Run 1 | 2.92 (0.05) | -30.53 (0.76) | -11.62 (0.54) | 10.93 (0.11) | -5.32 (0.01) | -42.15 (0.93) | 5.61 (0.11) | -36.54 (0.94) | -27.48 (2.87) |
| Run 2 | 2.91 (0.47) | -32.29 (0.84) | -11.63 (0.52) | 11.02 (0.12) | -5.51 (0.02) | -43.91 (0.98) | 5.51 (0.13) | -38.40 (0.99) | -31.95 (2.82) |
| Run 3 | 2.59 (0.04) | -31.87 (0.94) | -11.05 (0.58) | 10.75 (0.20) | -5.45 (0.12) | -42.91 (1.10) | 5.30 (0.20) | -37.61 (1.12) | -33.08 (2.55) |
| Concatenated  Trajectory | 2.84 (0.36) | -30.58 (0.75) | -11.59 (0.49) | 10.93 (0.11) | -5.32 (0.01) | -42.16 (0.90) | 5.60 (0.11) | -36.56 (0.90) | -30.92 (2.84) |
| **EGFR Erlotinib Complex** | | | | | | | | | |
| Run 1 | 3.15 (0.05) | -43.52 (1.14) | -3.12 (0.41) | 7.36 (0.46) | -5.57 (0.10) | -46.64 (1.21) | 1.79 (0.47) | -44.85 (1.30) | -37.47 (2.96) |
| Run 2 | 3.67 (0.07) | -45.84 (0.53) | -3.17 (0.49) | 7.84 (0.41) | -6.03 (0.07) | -49.00 (0.72) | 1.81 (0.42) | -47.19 (0.83) | -39.85 (3.54) |
| Run 3 | 3.56 (0.05) | -46.28 (0.69) | -3.19 (0.46) | 7.52 (0.45) | -5.93 (0.01) | -49.47 (0.83) | 1.59 (0.45) | -47.88 (0.94) | -39.17 (3.40) |
| Concatenated  Trajectory | 3.12 (0.05) | -43.37 (1.02) | -3.11 (0.44) | 7.35 (0.43) | -5.56 (0.08) | -46.48 (1.11) | 1.79 (0.44) | -44.69 (1.19) | -38.77 (2.95) |

ΔVDWAALS: van der Waals energy; ΔEEL: Electrostatic energies; ΔEGB: Polar solvation energy; ΔENPOLAR: Nonpolar solvation energy; ΔGGAS = ΔVDWAALS+ΔEEL; ΔGSOLV = ΔEGB+ ΔESURF; ΔTOTAL = ΔGSOLV +ΔGGAS; ΔG binding = ΔTOTAL – TΔS (Standard deviations are given in parentheses)
