# Supplementary figures and images for: In silico exploration of anticancer plant phytochemicals for EGFR-targeted lung cancer therapy
Source: Research Square preprint supplement (doi:10.21203/rs.3.rs-6422271/v1), 2025-05-07

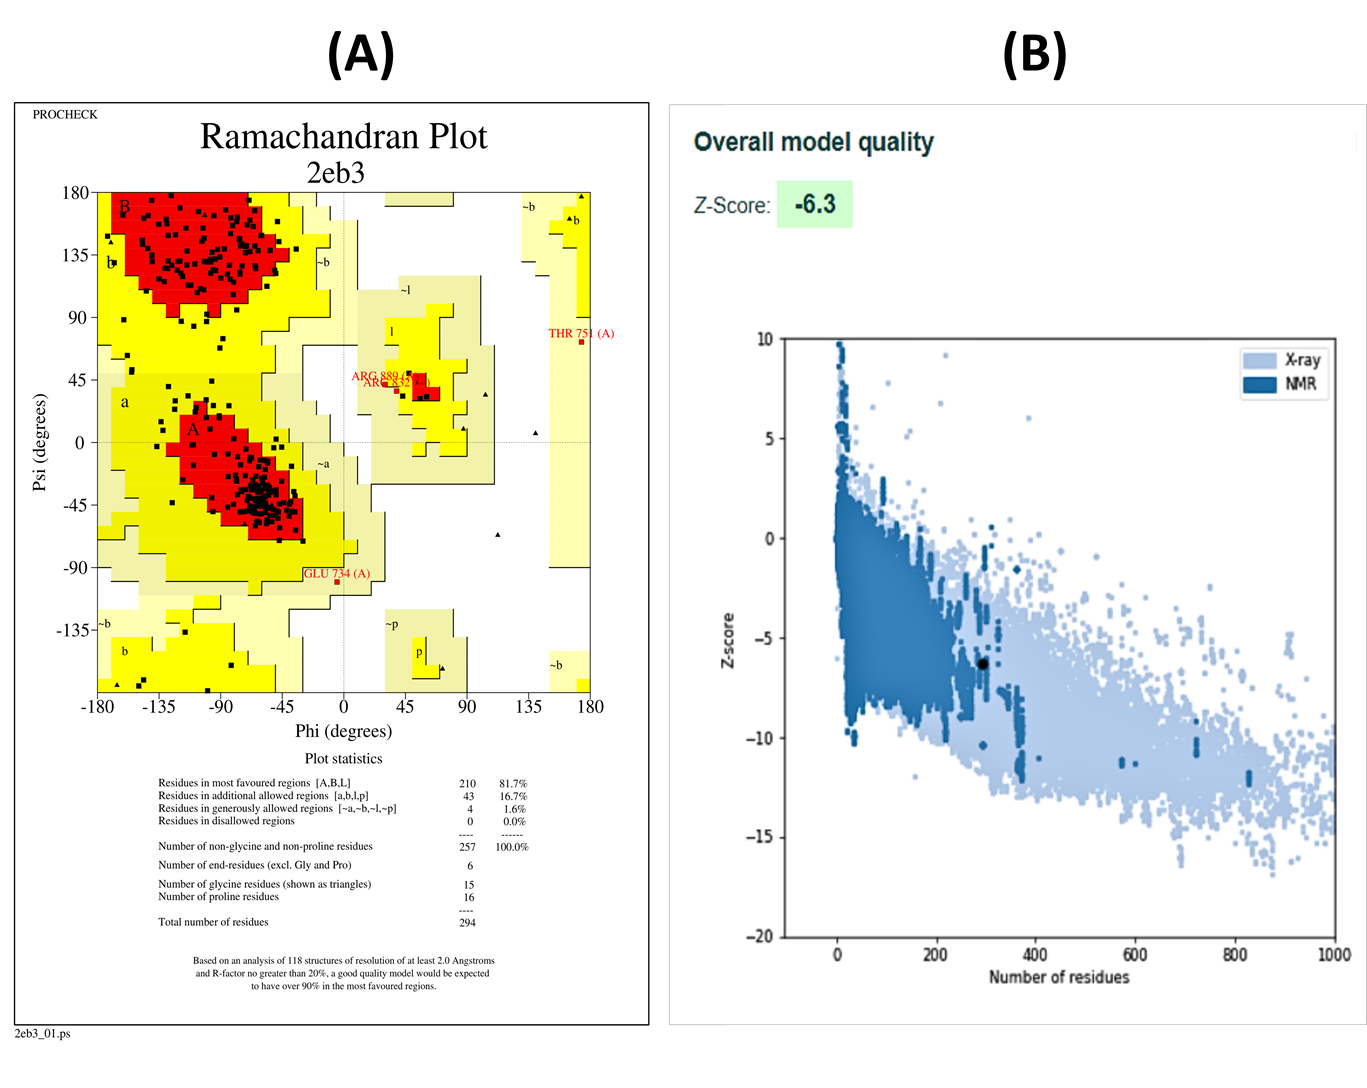


**Figure S2:** (A) Ramachandran plot EGFR protein (PDB: 2EB3) (B) Z-score EGFR protein (PDB: 2EB3)

Supplement: Supplementary file 2 [file 33700edda8e596a508293eaf.docx]

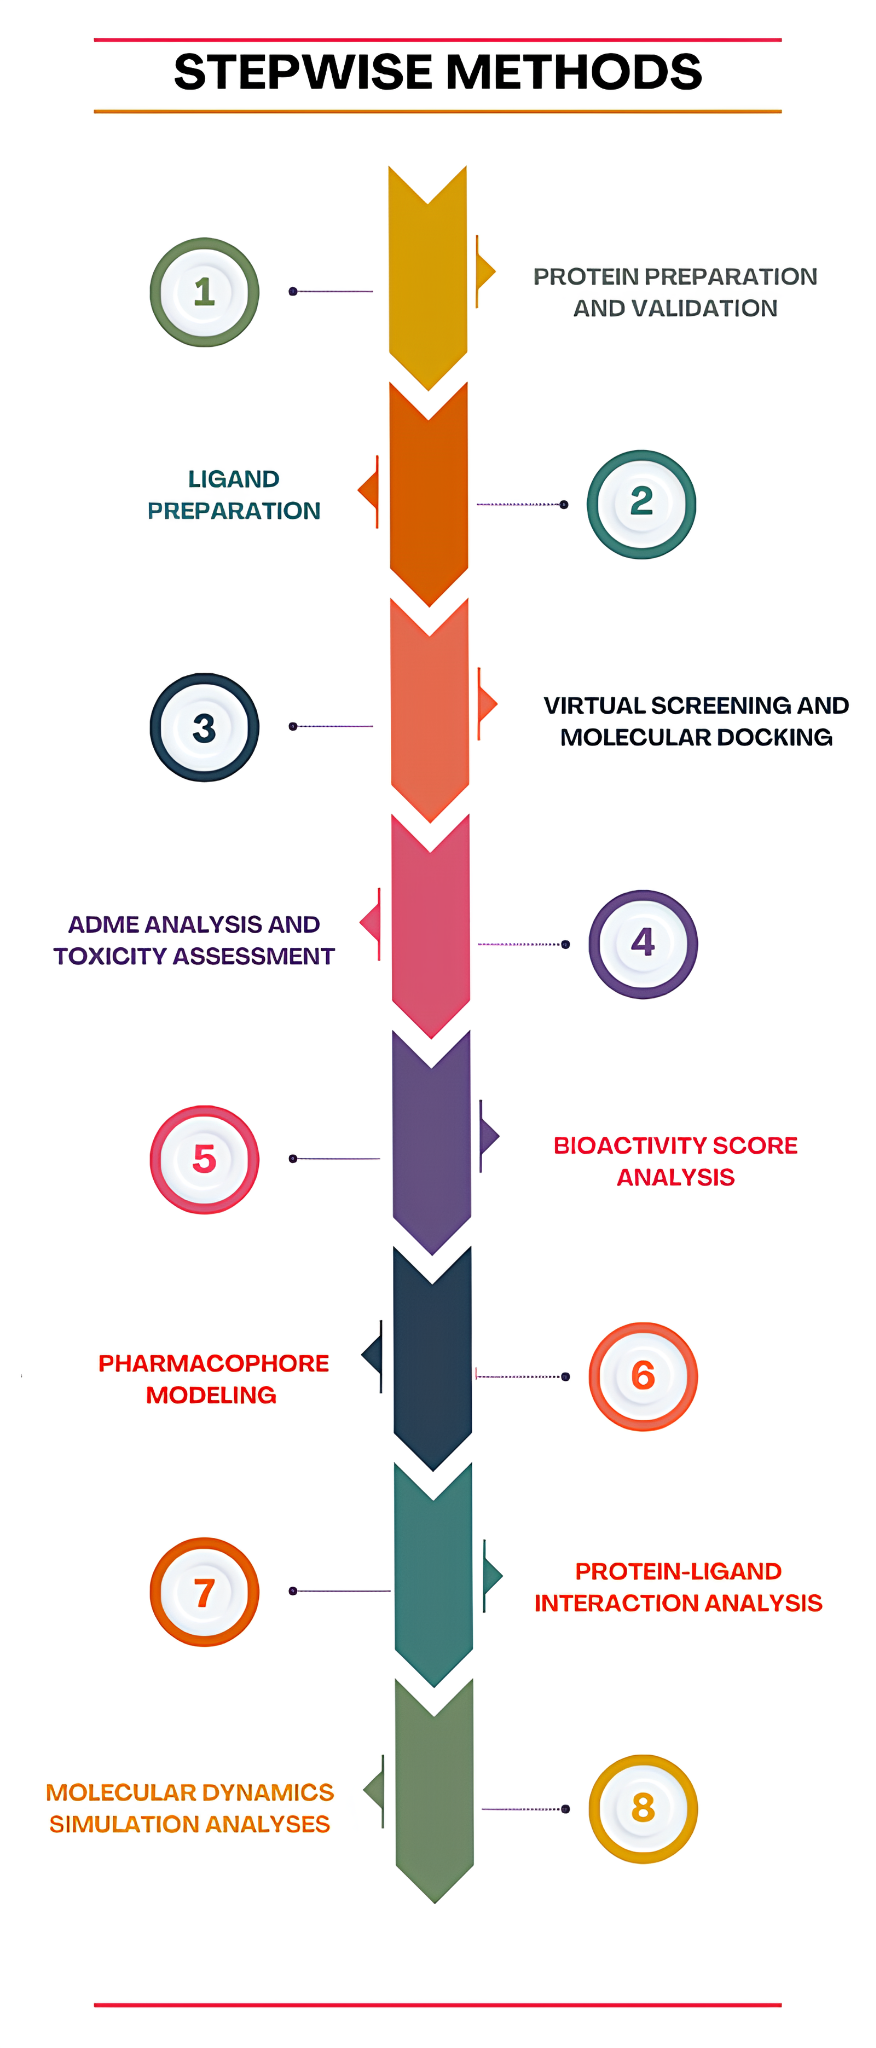


**Figure S1:** Stepwise flow diagram of the methods followed in the study

Supplement: Supplementary file 5 [file 8be4eab3becd3be26ca52d3a.docx]
